# Supplementary material for: Advances in photocatalytic NOx abatement through the use of Fe2O3/TiO2 nanocomposites
Source: Royal Society of Chemistry journal article supplement (doi:10.1039/c6ra15958c), 2016-01-01
Supplement: c6ra15958c1.pdf [file c6ra15958c1.pdf]

## Electronic Supplementary Information

# Advances in photocatalytic NO<sub>x</sub> abatement through the use of Fe<sub>2</sub>O<sub>3</sub>/TiO<sub>2</sub> nanocomposites

*José Balbuena,<sup>a</sup> Giorgio Carraro,<sup>b,\*</sup> Manuel Cruz,<sup>a</sup> Alberto Gasparotto,<sup>b</sup>*

*Chiara Maccato,<sup>b</sup> Adrián Pastor,<sup>a</sup> Cinzia Sada,<sup>c</sup> Davide Barreca,<sup>d</sup> and Luis Sánchez<sup>a,\*</sup>*

<sup>a</sup> Department of Inorganic Chemistry and Engineering Chemistry, Córdoba University, 14071 Córdoba, Spain.

<sup>b</sup> Department of Chemistry, Padova University and INSTM, 35131 Padova, Italy.

<sup>c</sup> Department of Physics and Astronomy, Padova University and INSTM, 35131 Padova, Italy.

<sup>d</sup> ICMATE-CNR and INSTM, Department of Chemistry, Padova University and INSTM, 35131 Padova, Italy.

\* Authors to whom correspondence should be addressed; E-mail: [giorgio.carraro@unipd.it](mailto:giorgio.carraro@unipd.it); [luis-sanchez@uco.es](mailto:luis-sanchez@uco.es).

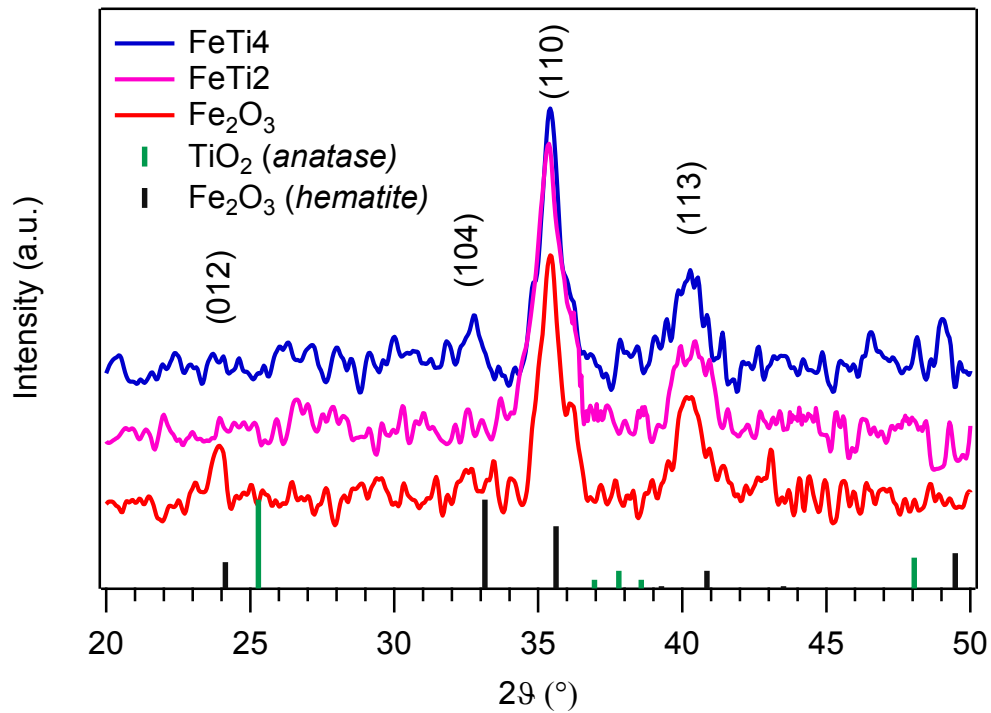

**Fig. S1.** XRD diffraction patterns for bare Fe<sub>2</sub>O<sub>3</sub> and for Fe<sub>2</sub>O<sub>3</sub>-TiO<sub>2</sub> nanocomposites. Peak positions for *hematite* [Pattern N° 33-0664, JCPDS (2000)] and *anatase* [Pattern N° 021-1272, JCPDS (2000)] are marked by vertical bars.

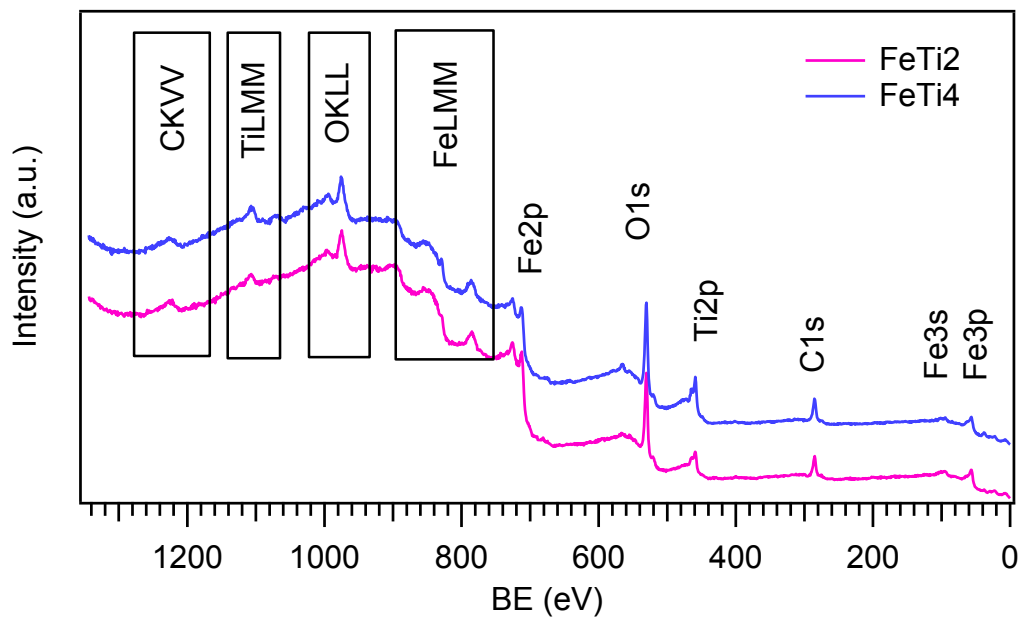

**Fig. S2.** Surface XPS survey spectra of Fe<sub>2</sub>O<sub>3</sub>-TiO<sub>2</sub> nanocomposites.

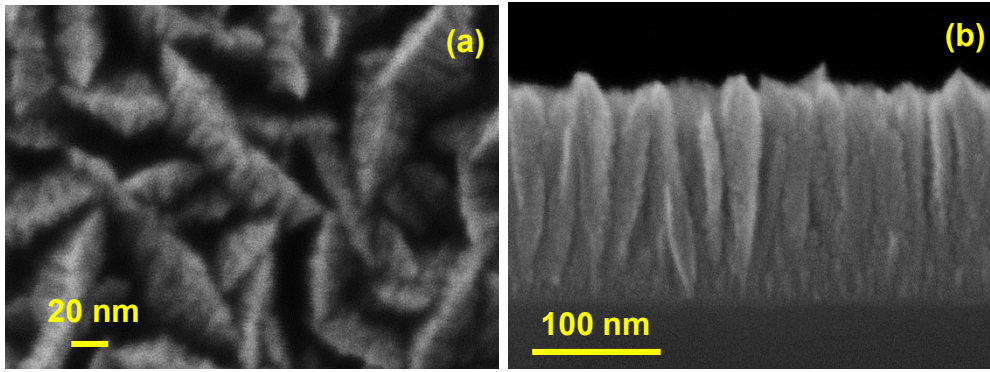

**Fig. S3.** Plane view (a) and cross sectional (b) FE-SEM micrographs for a bare  $\text{Fe}_2\text{O}_3$  deposit.

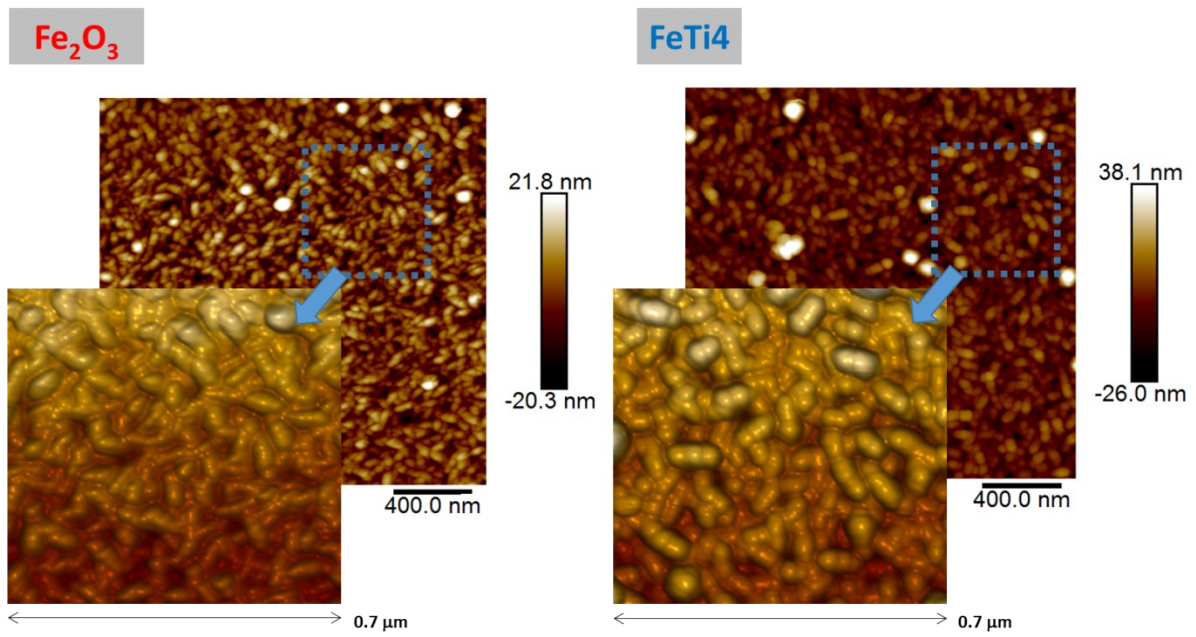

**Fig. S4.** Representative AFM micrographs for bare  $\text{Fe}_2\text{O}_3$  and  $\text{FeTi}_4$  specimens. Calculated root-mean-square (RMS) roughness values for  $\text{Fe}_2\text{O}_3$  and  $\text{FeTi}_4$  samples are 74 and 84 nm, respectively.

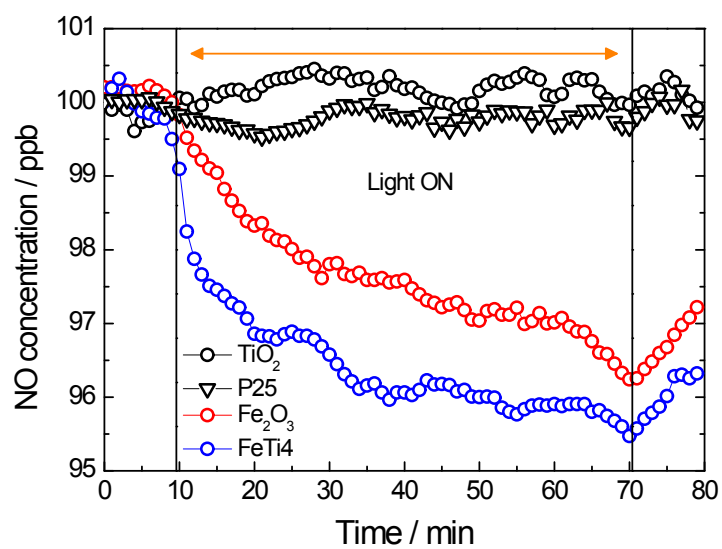

**Fig. S5.** Concentration profiles obtained for P25, TiO<sub>2</sub>, Fe<sub>2</sub>O<sub>3</sub> and FeTi4 samples during the photochemical degradation of gaseous NO under Vis light irradiation.

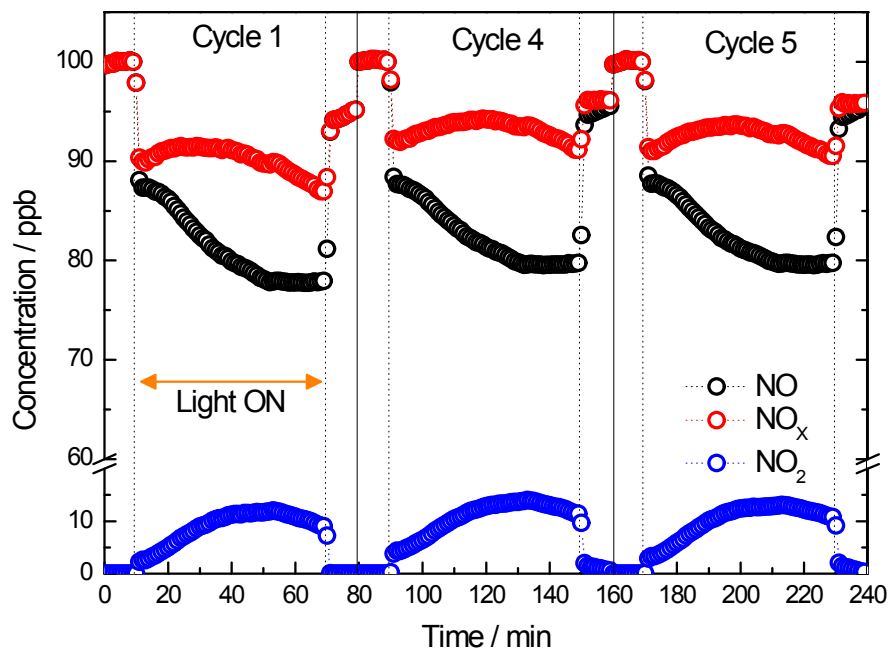

**Fig. S6.** Nitrogen oxide concentration profiles obtained for FeTi4 specimen under different utilization cycles.

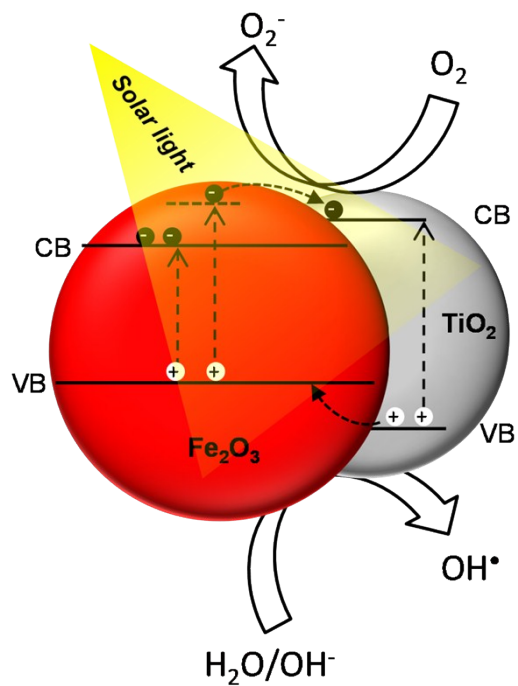

**Fig. S7.** Simplified representation of the mechanism for PC activity enhancement occurring in Fe<sub>2</sub>O<sub>3</sub>/TiO<sub>2</sub> nanocomposites.



## **IR analysis**

Infrared (IR) spectra were recorded by means of a Perkin Elmer FTIR System Spectrum BX, operating in transmittance mode at normal incidence.

The assignment of IR bands pertaining to Fig. S8 spectra is the following.

The band around  $1640\text{ cm}^{-1}$  corresponds to O–H bending vibrations, implying the presence of adsorbed water (Fig. S8a). The bands marked in Fig. S8b were assigned basing on to the previously reported information on the interaction of nitrogen oxides with  $\text{TiO}_2$ .<sup>1-3</sup> The bands located at  $1529$ ,  $1506$  and  $1487\text{ cm}^{-1}$  correspond to stretching vibrations of nitrate species<sup>1, 2, 4</sup> whereas those at  $1417$  and  $1261\text{ cm}^{-1}$  are ascribed to nitrite ones.<sup>2, 4</sup> The band at  $1710\text{ cm}^{-1}$  can be tentatively assigned to adsorbed  $\text{NO}_2$ .<sup>3</sup> A more detailed attribution of IR bands attributed to N–O stretching vibrations of surface nitrate ( $\text{NO}_3^-$ ) and nitrite ( $\text{NO}_2^-$ ) species is a difficult task, since  $\nu(\text{N–O})$  of different  $\text{NO}_3^-$  and  $\text{NO}_2^-$  species fall in the same  $1700\text{--}1000\text{ cm}^{-1}$  interval and their IR bands are strongly overlapped.<sup>1</sup>

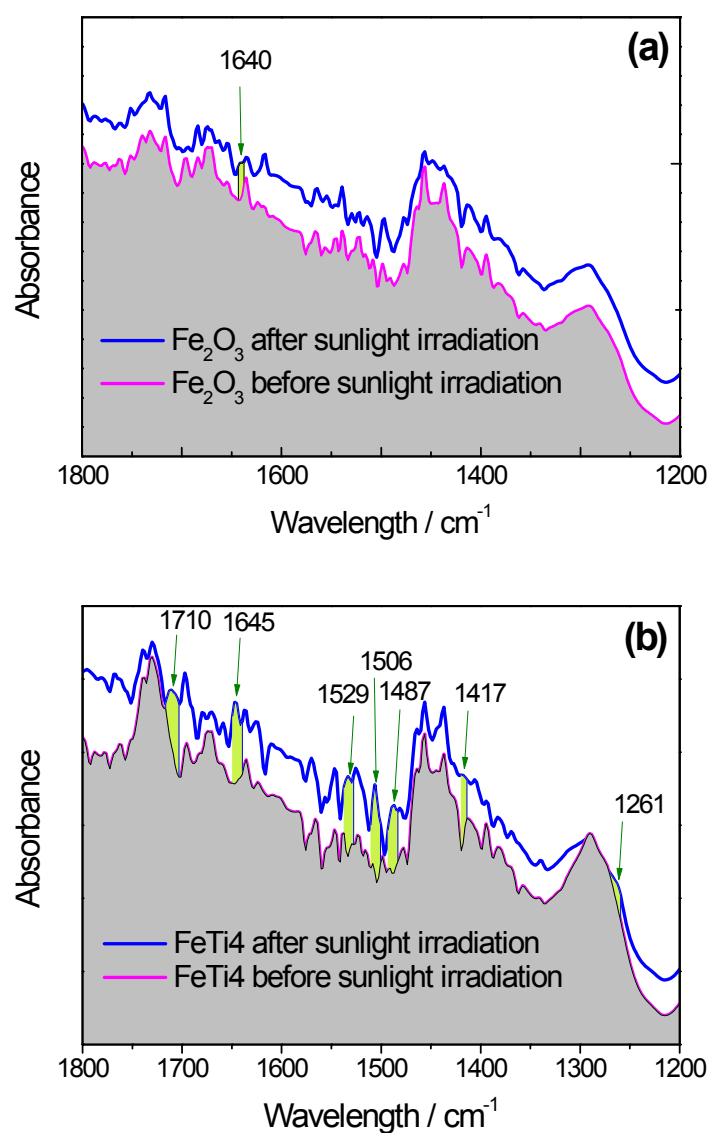

**Fig. S8.** IR spectra in the 1800 – 1200  $\text{cm}^{-1}$  range of (a)  $\text{Fe}_2\text{O}_3$  and (b) FeTi4 samples before and after  $\text{NO}_x$  degradation tests.

## References

1. R. V. Mikhaylov, A. A. Lisachenko, B. N. Shelimov, V. B. Kazansky, G. Martra and S. Coluccia, *J. Phys. Chem. C*, 2013, **117**, 10345-10352.
2. J. Sá and J. A. Anderson, *Appl. Catal. B*, 2008, **77**, 409-417.
3. B. Zhao, R. Ran, X. Wu, D. Weng, X. Wu and C. Huang, *Catal. Commun.*, 2014, **56**, 36-40.
4. K. I. Hadjiivanov, *Catal. Rev.*, 2000, **42**, 71-144.
